# Supplementary material
Source: PubMed Central journal article supplement (PMC3339989)
Supplement: supp_M112.340158_jbc.M112.340158-5.pdf [file supp_M112.340158_jbc.M112.340158-5.pdf]

**Table S2-** High confidence peptides matching USP9X and FASN in the MS/MS analysis of the 230-kDa band from SEC fraction 7<sup>#</sup>

| <b>Protein Name<br/>(Accession Number)</b> | <b>Peptide sequence</b> | <b>aa</b> | <b>Ion Score</b> | <b>Ion score C.I.<br/>%</b> | <b>Calculated<br/>Mass</b> | <b>Observed<br/>Mass</b> | <b>Match Error<br/>Da</b> | <b>Match Error<br/>PPM</b> |
|--------------------------------------------|-------------------------|-----------|------------------|-----------------------------|----------------------------|--------------------------|---------------------------|----------------------------|
| <b>USP9X<br/>(D3ZXB5_RAT)</b>              | FIEELR                  | 555-560   | 35,20            | 95,9                        | 806,44                     | 806,45                   | 0,01                      | 7                          |
|                                            | HLSFIVR                 | 885-891   | 43,37            | 99,4                        | 871,51                     | 871,51                   | -0,01                     | -10                        |
|                                            | SPHVFYR                 | 593-599   | 55,80            | 100                         | 905,46                     | 905,46                   | 0,00                      | 0                          |
|                                            | LQYYVPR                 | 1659-1665 | 49,66            | 99,9                        | 938,51                     | 938,51                   | 0,01                      | 6                          |
|                                            | EYNIGVLR                | 1638-1645 | 62,26            | 100                         | 963,53                     | 963,53                   | 0,01                      | 9                          |
|                                            | YQY AELGK               | 2220-2227 | 69,83            | 100                         | 971,48                     | 971,48                   | 0,00                      | -2                         |
|                                            | VLGGSFADQK*             | 1713-1722 | 75,36            | 100                         | 1021,53                    | 1021,55                  | 0,02                      | 16                         |
|                                            | FDYDWER*                | 1800-1806 | 50,84            | 99,9                        | 1030,43                    | 1030,43                  | 0,00                      | 0                          |
|                                            | EIYTNLGR                | 795-803   | 70,58            | 100                         | 1062,56                    | 1062,56                  | 0,00                      | 2                          |
|                                            | DGLFDTIQR               | 2367-2375 | 67,02            | 100                         | 1064,54                    | 1064,53                  | -0,01                     | -8                         |
|                                            | LYSVVSQ LIR             | 2228-2237 | 60,96            | 100                         | 1177,69                    | 1177,69                  | 0,00                      | -3                         |
|                                            | RFDYDWER*               | 1799-1806 | 58,14            | 100                         | 1186,53                    | 1186,53                  | 0,00                      | 1                          |
|                                            | FLFTTG FHTK*            | 2051-2060 | 74,46            | 100                         | 1198,63                    | 1198,61                  | -0,02                     | -15                        |
|                                            | HSGDYFTLLR              | 1371-1380 | 78,42            | 100                         | 1208,61                    | 1208,60                  | 0,00                      | -2                         |
|                                            | FNDYFEFPR*              | 1812-1820 | 70,85            | 100                         | 1234,55                    | 1234,55                  | -0,01                     | -5                         |
|                                            | VISSVSY YTHR            | 361-371   | 87,89            | 100                         | 1311,67                    | 1311,66                  | -0,01                     | -9                         |
|                                            | LLTAIGYGHVR             | 1157-1168 | 82,34            | 100                         | 1312,77                    | 1312,77                  | 0,00                      | -2                         |
|                                            | SGGLPLVLSMLTR           | 1120-1132 | 66,23            | 100                         | 1343,77                    | 1343,78                  | 0,00                      | 3                          |
|                                            | HLQVIFGHLAASR           | 1646-1658 | 78,52            | 100                         | 1448,81                    | 1448,81                  | 0,00                      | -2                         |
|                                            | FGTLNGFQILHDR*          | 228-240   | 42,14            | 99,2                        | 1517,79                    | 1517,78                  | 0,00                      | -1                         |
| HGSSEEEEWLTAER                             | 272-385                 | 127,35    | 100              | 1659,72                     | 1659,73                    | 0,00                     | 1                         |                            |
| GIPDDR DGLFDTIQR                           | 2361-2375               | 53,26     | 99,9             | 1717,85                     | 1717,85                    | 0,00                     | 0                         |                            |
| FWFAHNVLFNVSNR                             | 2086-2099               | 76,81     | 100              | 1750,88                     | 1750,89                    | 0,00                     | 3                         |                            |
| IELFVG GELIDPGDDRK                         | 932-948                 | 54,33     | 100              | 1872,97                     | 1872,97                    | 0,00                     | 2                         |                            |
| <b>FASN<br/>(Q3TB22_MOUSE)</b>             | DGAWGAFR                | 1501-1508 | 123,74           | 100                         | 879,41                     | 879,41                   | 0,00                      | 3                          |
|                                            | LQVVDRPLPVR             | 374-388   | 31,11            | 89,6                        | 1291,78                    | 1291,78                  | 0,00                      | -4                         |
|                                            | SYITGGLGGFGLELAR        | 1879-1895 | 28,11            | 79,2                        | 1723,94                    | 1723,94                  | 0,00                      | 3                          |

<sup>#</sup> aa- amino acid range corresponding to the sequence position of the identified peptide; Ion Score C.I. %- percentage of Ion Score Confidence Interval.

\* Although the MS/MS ion search did not identify USP9Y from any organism, sequence alignment of rat USP9X with mouse USP9Y (the rat USP9Y sequence is presently not available) suggest that some of the peptides assigned to rat USP9X might also be derived from USP9Y. These peptides are marked with an asterisk.
